# Supplementary material for: Defect-boosted molybdenite-based co-catalytic Fenton reaction
Source: Royal Society of Chemistry journal article supplement (doi:10.1039/d1qi00344e), 2021-01-01
Supplement: d1qi00344e1.pdf [file d1qi00344e1.pdf]

# Defects-Boosted Molybdenite-Based Co-Catalytic Fenton Reaction

*Feng Jiang<sup>1</sup>, Limin Zhang<sup>1</sup>, Tong Yue<sup>1</sup>, Honghu Tang<sup>1</sup>, Li Wang<sup>1</sup>, Wei Sun,<sup>\*1</sup> and  
Chenyang Zhang<sup>\*1</sup>, and Jinxing Chen<sup>\*2</sup>*

<sup>1</sup> School of Minerals Processing and Bioengineering, Central South University,  
Changsha 410083, China.

<sup>2</sup> Institute of Functional Nano & Soft Materials (FUNSOM), Jiangsu Key Laboratory  
for Carbon-Based Functional Materials & Devices, Soochow University, 199 Ren'ai  
Road, Suzhou, 215123 Jiangsu, PR China

## Materials and Methods

### Materials reagents

Synthetic pure molybdenum disulfide ( $\text{MoS}_2$ ,  $\sim 5 \mu\text{m}$ , purchased from Sinopharm Chemical Reagent Co., Ltd.), Ferrous sulfate ( $\text{FeSO}_4 \cdot 7\text{H}_2\text{O}$ ), hydrogen peroxide (30% wt), rhodamine B (RhB) and tetracycline (TC) were used without further purification.

### Materials characterization

The crystal structure of the as-prepared materials was identified by X-ray diffraction (XRD, Bruker D8 diffractometer with monochromatic  $\text{Cu K}\alpha$  radiation and wavelength of  $1.5406 \text{ \AA}$ ). The morphology was analyzed by field emission scanning electron

microscopy (SEM, FEI Quanta 200, Japan) and transmission electron microscopy (TEM, JEM-2100F, Japan).

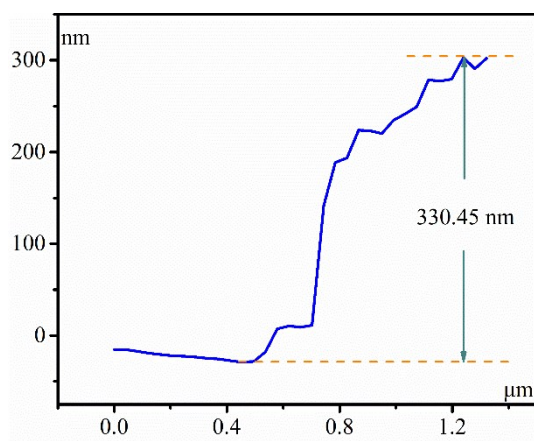

**Figure S1.** AFM images and thickness measurement of natural molybdenite sample.

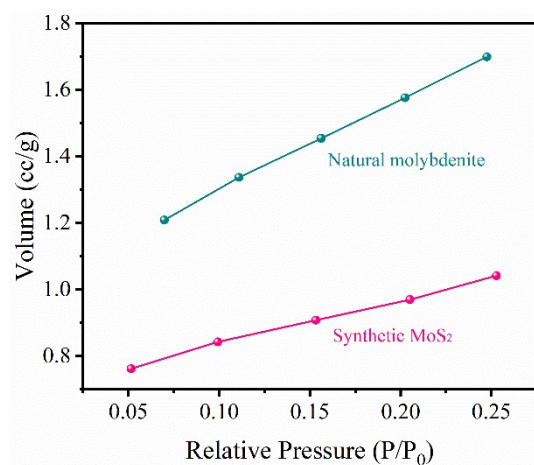

**Figure S2.** BET test results of natural molybdenite and synthetic MoS<sub>2</sub>.

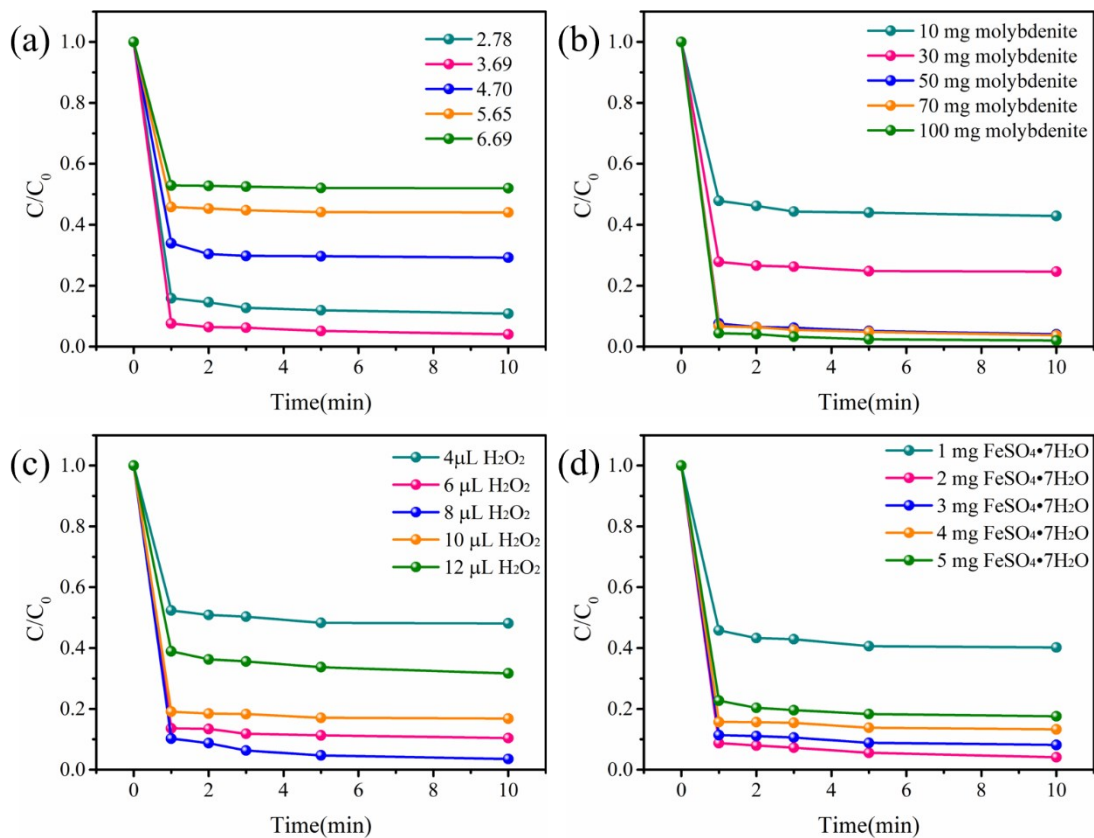

**Figure S3.** Different influencing factors of the molybdenite co-catalytic Fenton system for degradation of RhB (50 mg/L). (a) pH value influence (100 mL of aqueous solution including 0.02 g/L of FeSO<sub>4</sub>·7H<sub>2</sub>O, 0.5 g/L of molybdenite and 8 μL of H<sub>2</sub>O<sub>2</sub>); (b) Molybdenite dosage influence (100 mL of aqueous solution including 0.02 g/L of FeSO<sub>4</sub>·7H<sub>2</sub>O and 8 μL of H<sub>2</sub>O<sub>2</sub>, pH 3.5~4); (c) H<sub>2</sub>O<sub>2</sub> dosage influence (100 mL of aqueous solution including 0.02 g/L of FeSO<sub>4</sub>·7H<sub>2</sub>O and 0.5 g/L of molybdenite, pH 3.5~4); and (d) FeSO<sub>4</sub>·7H<sub>2</sub>O dosage influence (100 mL of aqueous solution including 0.5 g/L of molybdenite and 8 μL of H<sub>2</sub>O<sub>2</sub>, pH 3.5~4).

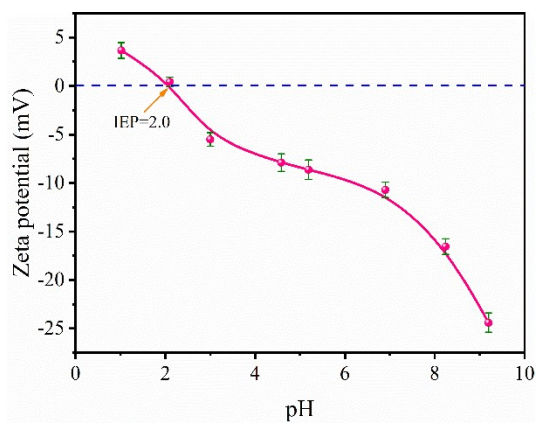

**Figure S4.** Zeta potentials of molybdenite particles as a function of pH.

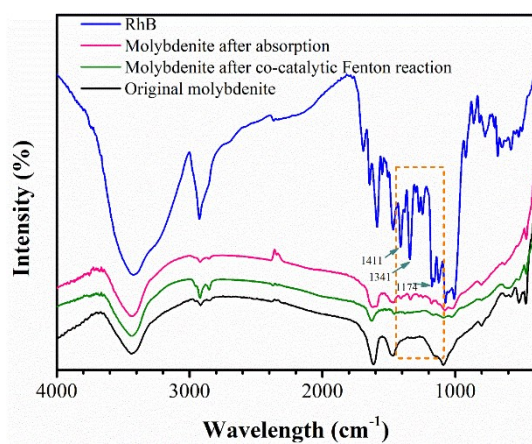

**Figure S5.** FTIR spectra of RhB, original molybdenite and molybdenite after adsorbing RhB and co-catalytic Fenton reaction.

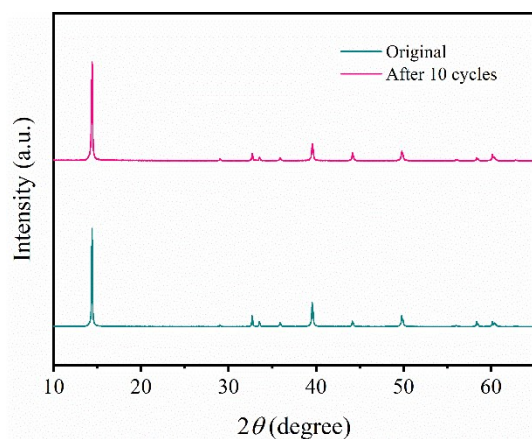

**Figure S6.** XRD spectra of the molybdenite before and after cyclic tests.

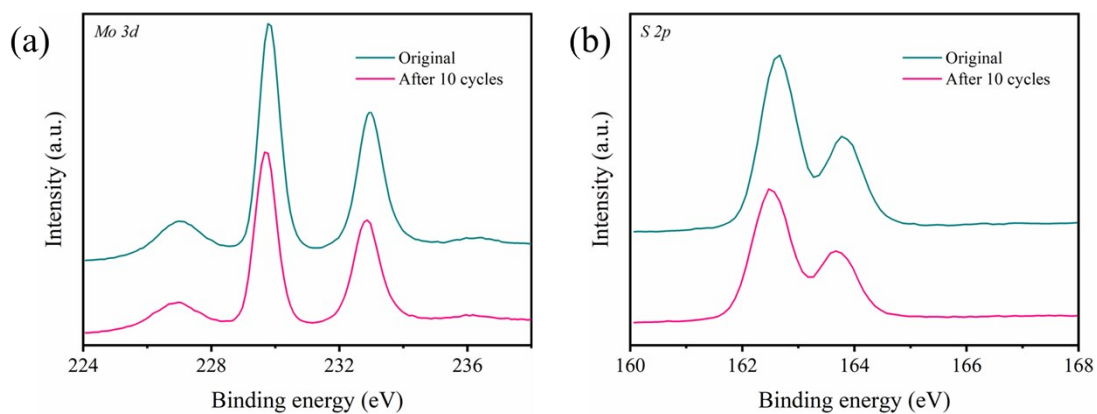

**Figure S7.** XPS (a) Mo 3d and (b) S 2p spectra of the molybdenite before and after cyclic tests.

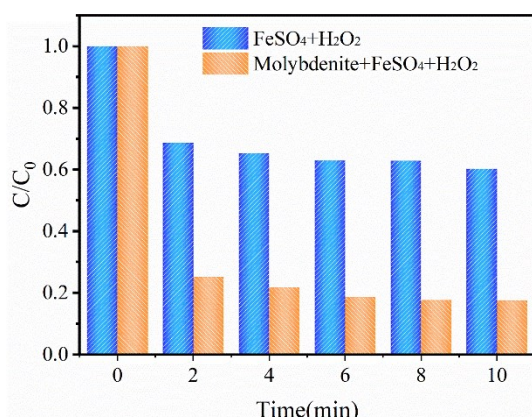

**Figure S8.** Comparison of conventional Fenton reaction and molybdenite co-catalytic Fenton system for degradation of COD.

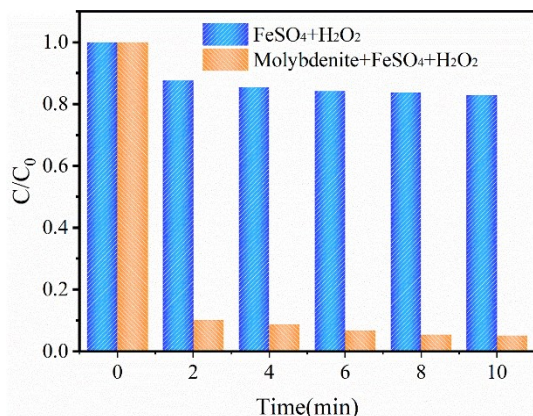

**Figure S9.** Comparison of conventional Fenton reaction and molybdenite co-catalytic Fenton system for degradation of tetracycline.

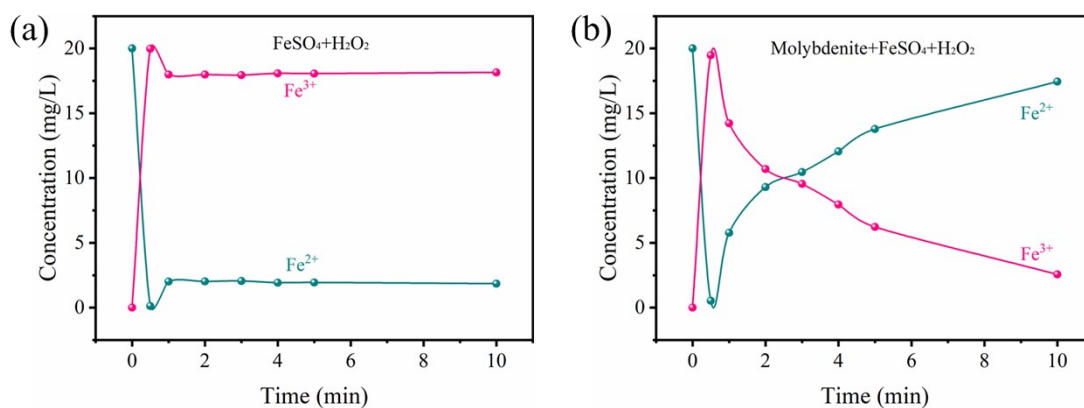

**Figure S10.** The concentration variations of Fe<sup>2+</sup> and Fe<sup>3+</sup> in (a) Fenton reaction and (b) molybdenite co-catalytic Fenton system

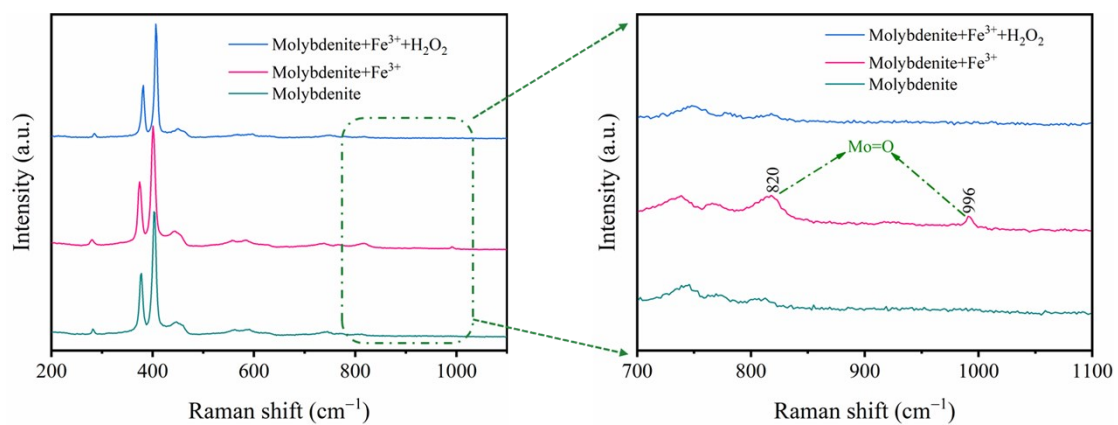

**Figure S11.** Raman spectra of molybdenite under different conditions.

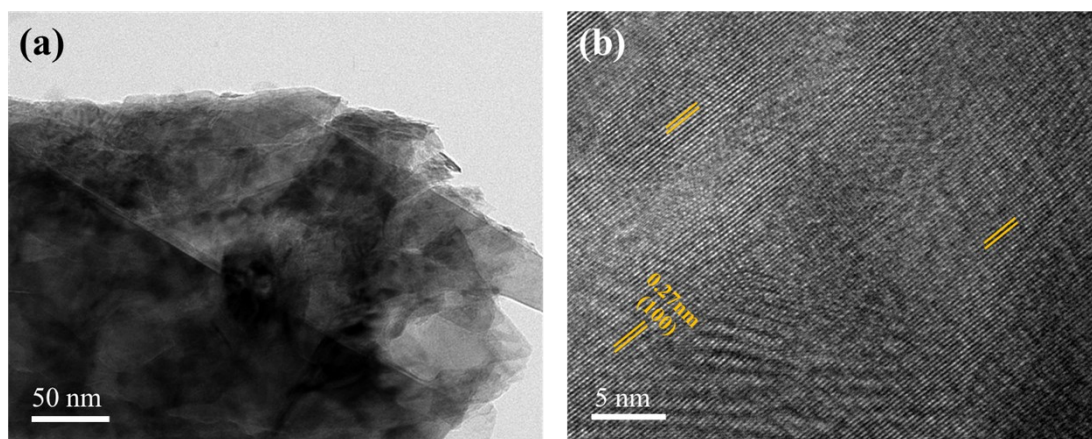

**Figure S12.** (a) TEM and (b) HRTEM images of the molybdenite after cyclic tests.

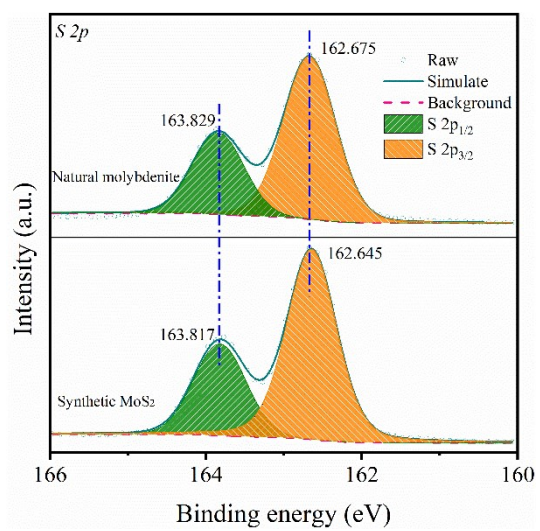

**Figure S13.** S 2p XPS spectra of molybdenite and synthetic MoS<sub>2</sub> samples.
